# Supplementary material for: Lowering the Criterion for Impaired Fasting Glucose
Source: Oxford University Press journal article supplement (doi:10.2337/diacare.27.7.1728), 2004-07-01
Supplement: 1728-sup-online_appendix_dc031525.doc [file 1728-sup-online_appendix_dc031525.doc]

Supplemental table 1. Demographic characteristics of the Thyroid Heart Study, 1992 National Health Survey and the National University of Singapore Heart Study

|  |  | Thyroid Heart Study | 1992 National Health Survey | National University of Singapore heart Study |
| --- | --- | --- | --- | --- |
| Age in years | mean (s.d.) | 37.2 (13.4) | 38.3 (12.9) | 50.2 (10.8) |
| Gender (%) | Male | 50.9 | 48.2 | 50.7 |
| Female | 49.1 | 51.8 | 49.3 |
| Ethnic group (%) | Chinese | 64.5 | 64.8 | 33.8 |
| Malay | 21.2 | 18.5 | 30.8 |
| Asian Indian | 14.3 | 16.7 | 25.4 |
