# Supplementary material for: Lowering the Criterion for Impaired Fasting Glucose
Source: Oxford University Press journal article supplement (doi:10.2337/diacare.27.7.1728), 2004-07-01
Supplement: 1728-sup-online_appendix_dc031525_legend.doc [file 1728-sup-online_appendix_dc031525_legend.doc]

Legend for supplemental Fig. 1—Receiver operating characteristics analysis to determine the level of fasting plasma glucose (FPG) closes to the ideal of 100% sensitivity and 100% specificity for predicting various outcomes: (a) impaired glucose tolerance or diabetes mellitus based on the 1998 Singapore National Health Survey, (b) impaired glucose tolerance, diabetes mellitus excluded based on the 1998 Singapore National Health Survey and (c) incident diabetes based on data from the Singapore impaired glucose tolerance follow-up study.
